# Supplementary material for: Long-range transport of air pollutants increases the concentration of hazardous components of PM 2.5 in northern South America
Source: Copernicus journal article supplement (doi:10.5194/acp-24-11497-2024), 2024-10-16
Supplement: Supplementary file 1 [file acp-24-11497-2024-supplement.pdf]

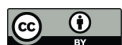

*Supplement of*

## **Long-range transport of air pollutants increases the concentration of hazardous components of PM<sub>2.5</sub> in northern South America**

**Maria P. Velá**

*Correspondence to:* Maria P. Velásquez-García (eempvg@leeds.ac.uk)

The copyright of individual parts of the supplement might differ from the article licence.

## Figure content

- Figure S1.** Average magnitudes of OM-AOD (a.), Du-AOD (b.), and TCSO<sub>2</sub> (c.) concentration around the events. Different colors represent different anomalies. The shadowed region delimits the event.<sup>2</sup>
- Figure S2.** OM-AOD, Du-AOD and TCSO<sub>2</sub> time series and event periods for (a) BB-LRT, (b) Dust-LRT and (c) Volcanic-LRT along with chemical sampling days for the selected events. .... 2
- Figure S3.** PMF's Factor profiles for the models run for the set of sampling days for (a) BB aerosols, (b) dust and (c) volcanic aerosols. .... 4
- Figure S4.** Factor contribution for BB, dust, and volcanic emissions factors identified in the PMF models for BB-LRT, Dust-LRT, and Volcanic-LRT ..... 5

## Tables content

- Table S1.** PM<sub>2.5</sub> average concentration (ug/m<sup>3</sup>) and percentage of exceedance of daily WHO [RP1] (15 ug/m<sup>3</sup>) and national (37 ug/m<sup>3</sup>) standards for urban stations from the Aburrá Valley's official air quality network during the study period..... 1
- Table S2.** Median magnitudes in ng/m<sup>3</sup> of the concentration of PM<sub>2.5</sub> chemical compounds during the study period and during and around (before and after) the identified events of BB-LRT, Dust-LRT and Volcanic-LRT. The ratio OC/EC and SOC/OC are also included, these are dimensionless. .... 3

**Table S1.** PM<sub>2.5</sub> average concentration (ug/m<sup>3</sup>) and percentage of exceedance of daily WHO (15 ug/m<sup>3</sup>) and national (37 ug/m<sup>3</sup>) standards for urban stations from [the Aburrá Valley's official air quality network](#) during the study period

| Official AQ Station | 2019    |       |            | 2020    |       |            | 2021    |       |            | 2022    |       |            |
|---------------------|---------|-------|------------|---------|-------|------------|---------|-------|------------|---------|-------|------------|
|                     | Average | % WHO | % National |
| CEN-TRAF            | 28.6    | 99.2  | 14.2       | 25.5    | 87.2  | 10.9       | 25.0    | 97.0  | 1.9        | 26.7    | 98.6  | 5.5        |
| ENV-HOSP            | 17.5    | 54.0  | 3.0        | 16.8    | 41.0  | 6.8        | 14.3    | 39.2  | 0.3        | 15.3    | 46.0  | 0.5        |
| EST-HOSP            | 18.8    | 63.3  | 4.4        | 17.2    | 45.1  | 5.7        | 14.8    | 43.8  | 0.3        | 15.7    | 50.4  | 0.5        |
| ITA-CJUS            | 23.4    | 91.5  | 6.8        | 22.7    | 79.0  | 10.7       | 20.8    | 87.7  | 1.4        | 23.7    | 90.7  | 4.9        |
| ITA-CONC            | 18.5    | 66.3  | 2.7        | 19.6    | 64.2  | 6.8        | 16.6    | 61.4  | 0.3        | 16.7    | 47.1  | 0.3        |
| MED-ALTA            | 22.7    | 92.6  | 5.2        | 19.9    | 69.7  | 6.0        | 18.6    | 79.7  | 0.5        | 19.4    | 81.6  | 1.1        |
| MED-ARAN            | 22.2    | 86.0  | 7.4        | 20.1    | 62.8  | 9.6        | 17.8    | 68.2  | 0.5        | 19.3    | 77.8  | 0.5        |
| MED-BEME            | 21.7    | 83.0  | 4.7        | 19.5    | 64.2  | 7.1        | 19.9    | 78.1  | 0.5        | 20.2    | 82.5  | 0.5        |
| MED-LAYE            | 19.2    | 71.5  | 2.2        | 17.7    | 50.3  | 5.5        | 17.1    | 65.2  | 0.3        | 17.7    | 61.9  | 1.4        |
| MED-TESO            | 17.2    | 54.0  | 3.3        | 16.8    | 42.3  | 6.8        | 14.9    | 45.8  | 0.3        | 15.7    | 50.1  | 1.1        |
| MED-VILL            | 18.9    | 66.8  | 3.8        | 18.4    | 53.8  | 6.8        | 16.2    | 57.0  | 0.8        | 17.4    | 63.6  | 0.3        |
| SAB-RAME            | 18.5    | 63.0  | 3.3        | 17.8    | 50.8  | 6.8        | 15.6    | 50.4  | 0.3        | 17.4    | 63.8  | 0.8        |

**Note:** this table includes the official air quality stations in the most urbanized zone of the Aburrá Valley. The MED-BEME site corresponds to the location of the chemical sampling campaign (shadowed row).

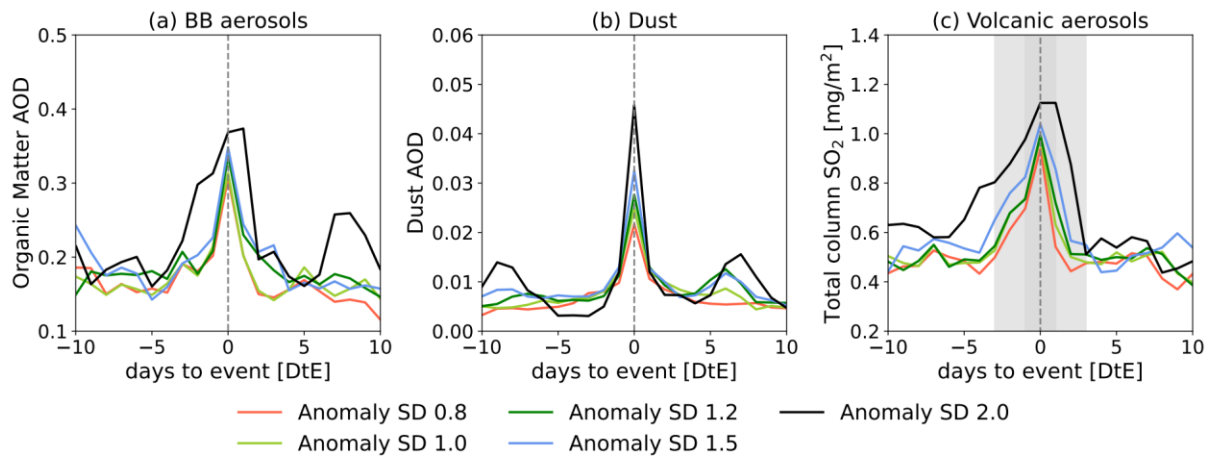

**Figure S1.** Average magnitudes of OM-AOD (a.), Du-AOD (b.), and TCSO<sub>2</sub> (c.) concentration around the events. Different colors represent different anomalies. The shadowed region delimits the event.

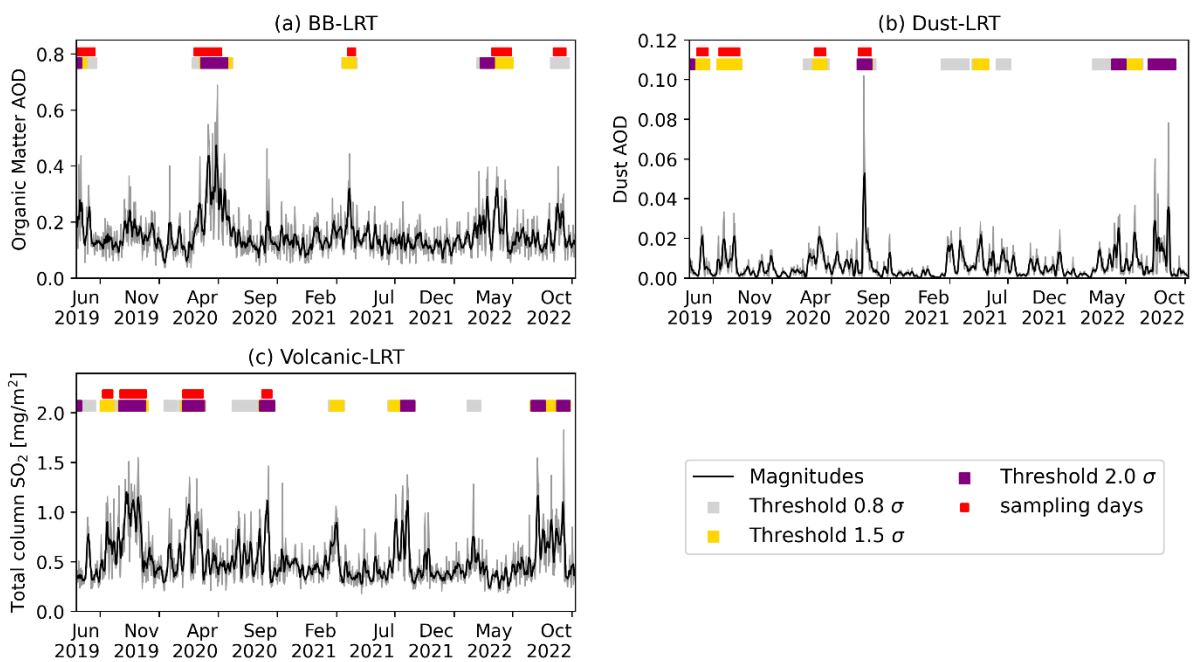

**Figure S2.** OM-AOD, Du-AOD and TCSO<sub>2</sub> time series and event periods for (a) BB-LRT, (b) Dust-LRT and (c) Volcanic-LRT along with chemical sampling days for the selected events.

**Table S2.** Median magnitudes in ng/m<sup>3</sup> of the concentration of PM<sub>2.5</sub> chemical compounds during the study period and during and around (before and after) the identified events of BB-LRT, Dust-LRT and Volcanic-LRT. The ratio OC/EC and SOC/OC are also included, these are dimensionless.

|           | Median  | Median BB-LRT | Median Around BB-LRT | Median Dust-LRT | Median Around Dust-LRT | Median Volcanic-LRT | Median Around Volcanic-LRT |
|-----------|---------|---------------|----------------------|-----------------|------------------------|---------------------|----------------------------|
| Be        | 0.01    | 0.02          | 0.01                 | 0.01            | 0.02                   | 0.01                | 0.01                       |
| Na        | 202.69  | 331.22        | 101.71               | 11.69           | 221.57                 | 539.06              | 194.07                     |
| Mg        | 77.04   | 109.44        | 64.61                | 78.81           | 81.64                  | 112.55              | 85.34                      |
| Al        | 445.42  | 542.72        | 318.58               | 525.32          | 414.15                 | 671.58              | 450.85                     |
| Si        | 231.83  | 282.48        | 165.82               | 273.42          | 215.55                 | 349.54              | 234.66                     |
| K         | 240.44  | 256.3         | 233.41               | 289.36          | 207.07                 | 210.85              | 203.13                     |
| Ca        | 259.26  | 313.05        | 187.94               | 262.92          | 259.26                 | 416.02              | 257.21                     |
| Ti        | 18.34   | 25.99         | 14.82                | 24.2            | 20.51                  | 31.27               | 18.93                      |
| V         | 1.26    | 1.39          | 0.85                 | 1.44            | 1.29                   | 1.83                | 1.34                       |
| Cr        | 1.46    | 1.67          | 0.87                 | 1.47            | 1.47                   | 2.3                 | 1.37                       |
| Mn        | 3.97    | 4.64          | 3.45                 | 4.44            | 4.05                   | 5.76                | 3.8                        |
| Fe        | 210.14  | 285.44        | 139.29               | 285.44          | 239.16                 | 346.95              | 234.13                     |
| Co        | 0.21    | 0.17          | 0.14                 | 0.23            | 0.19                   | 0.25                | 0.23                       |
| Ni        | 1.79    | 1.71          | 1.58                 | 2               | 1.63                   | 2.67                | 1.9                        |
| Cu        | 6.83    | 6.62          | 6.94                 | 4.38            | 5.37                   | 5.18                | 3.93                       |
| Zn        | 24.65   | 29.25         | 25.76                | 19.4            | 22.86                  | 26.76               | 20.31                      |
| As        | 0.98    | 0.7           | 1                    | 0.77            | 0.9                    | 0.62                | 0.77                       |
| Se        | 0.56    | 0             | 0.74                 | 0.37            | 0.66                   | 0.77                | 0.61                       |
| Mo        | 0.29    | 0.26          | 0.3                  | 0.2             | 0.23                   | 0.24                | 0.19                       |
| Ag        | 0.02    | 0.01          | 0.04                 | 0.02            | 0.01                   | 0.02                | 0.01                       |
| Cd        | 0.13    | 0.18          | 0.11                 | 0.08            | 0.15                   | 0.13                | 0.14                       |
| Sb        | 0.79    | 0.62          | 0.75                 | 0.74            | 0.83                   | 0.8                 | 0.8                        |
| Ba        | 11.5    | 13.3          | 10.96                | 10.71           | 10.16                  | 17.66               | 10.88                      |
| Hg        | 0.08    | 0.04          | 0.08                 | 0.05            | 0.08                   | 0.1                 | 0.08                       |
| Pb        | 3.31    | 2.71          | 3.11                 | 2.81            | 3.67                   | 3.19                | 3.16                       |
| Fluoride  | 13.29   | 34.04         | 10.8                 | 27.58           | 22.39                  | 14.01               | 19.72                      |
| Chloride  | 71.75   | 253.53        | 149.07               | 96.1            | 186.56                 | 101.93              | 103.37                     |
| Nitrate   | 400.79  | 529.11        | 595.34               | 394.31          | 441.75                 | 384.72              | 396.03                     |
| Sulphate  | 1376.4  | 2790.83       | 1899.46              | 1826.07         | 1472.98                | 1096.26             | 1474.96                    |
| Potassium | 88.76   | 118.94        | 111.8                | 96.88           | 87.13                  | 134.67              | 37.2                       |
| magnesium | 10.55   | 13.74         | 11.97                | 11.92           | 12.15                  | 8.51                | 9.49                       |
| Calcium   | 24.97   | 31.52         | 27                   | 30.79           | 29.96                  | 19.93               | 21.76                      |
| Sodium    | 164.6   | 124.84        | 22.62                | 134.06          | 267.04                 | 322.77              | 125.08                     |
| C         | 6269.62 | 10191.5       | 6902.07              | 6661.92         | 7437.02                | 8214.57             | 6440.68                    |
| OC        | 5568.07 | 9249.99       | 5978.83              | 5762.34         | 6728.79                | 7375.77             | 5719.63                    |
| EC        | 694     | 778.54        | 782.29               | 778.54          | 729.04                 | 724.98              | 696.7                      |
| OC1       | 1162.73 | 2001.79       | 1237.05              | 1101.18         | 1320.94                | 1352.2              | 1115.57                    |
| OC2       | 1217.86 | 2286.4        | 1247.75              | 1217.86         | 1444.06                | 1495.25             | 1218.81                    |
| OC3       | 470.91  | 764.49        | 481.52               | 498.86          | 581.24                 | 599.19              | 470.99                     |

|        |         |         |         |         |         |         |         |
|--------|---------|---------|---------|---------|---------|---------|---------|
| OC4    | 725.17  | 1221.59 | 806.68  | 807.4   | 945.4   | 886.61  | 759.74  |
| OC5    | 9.53    | 13.12   | 11.01   | 14.16   | 17.58   | 20.42   | 11.16   |
| PyC    | 1902.34 | 3231.61 | 1982.31 | 1855.19 | 2001.91 | 2703.61 | 2105.51 |
| EC1    | 277.01  | 453.57  | 284.18  | 271.09  | 251.99  | 324.86  | 303.31  |
| EC2    | 1383.02 | 2080.26 | 1041.19 | 1183.03 | 1130.96 | 1454.13 | 1632.26 |
| EC3    | 652.09  | 778.04  | 766.96  | 1030.82 | 1013.25 | 915.21  | 751.53  |
| EC4    | 88.97   | 77.92   | 97.08   | 233.35  | 185.49  | 150.8   | 103.67  |
| EC5    | 17.29   | 22.44   | 18.85   | 20.16   | 20.42   | 19.9    | 16.87   |
| EC6    | 18.34   | 24.83   | 19.2    | 20.56   | 19.43   | 20.68   | 15.97   |
| OC/EC  | 7.84    | 11.29   | 7.21    | 7.71    | 7.76    | 9.51    | 8.13    |
| SOC    | 1871.01 | 5034.98 | 1085.18 | 3064.9  | 3064.06 | 2928.61 | 2429.04 |
| SOC/OC | 0.34    | 0.54    | 0.2     | 0.46    | 0.41    | 0.46    | 0.39    |

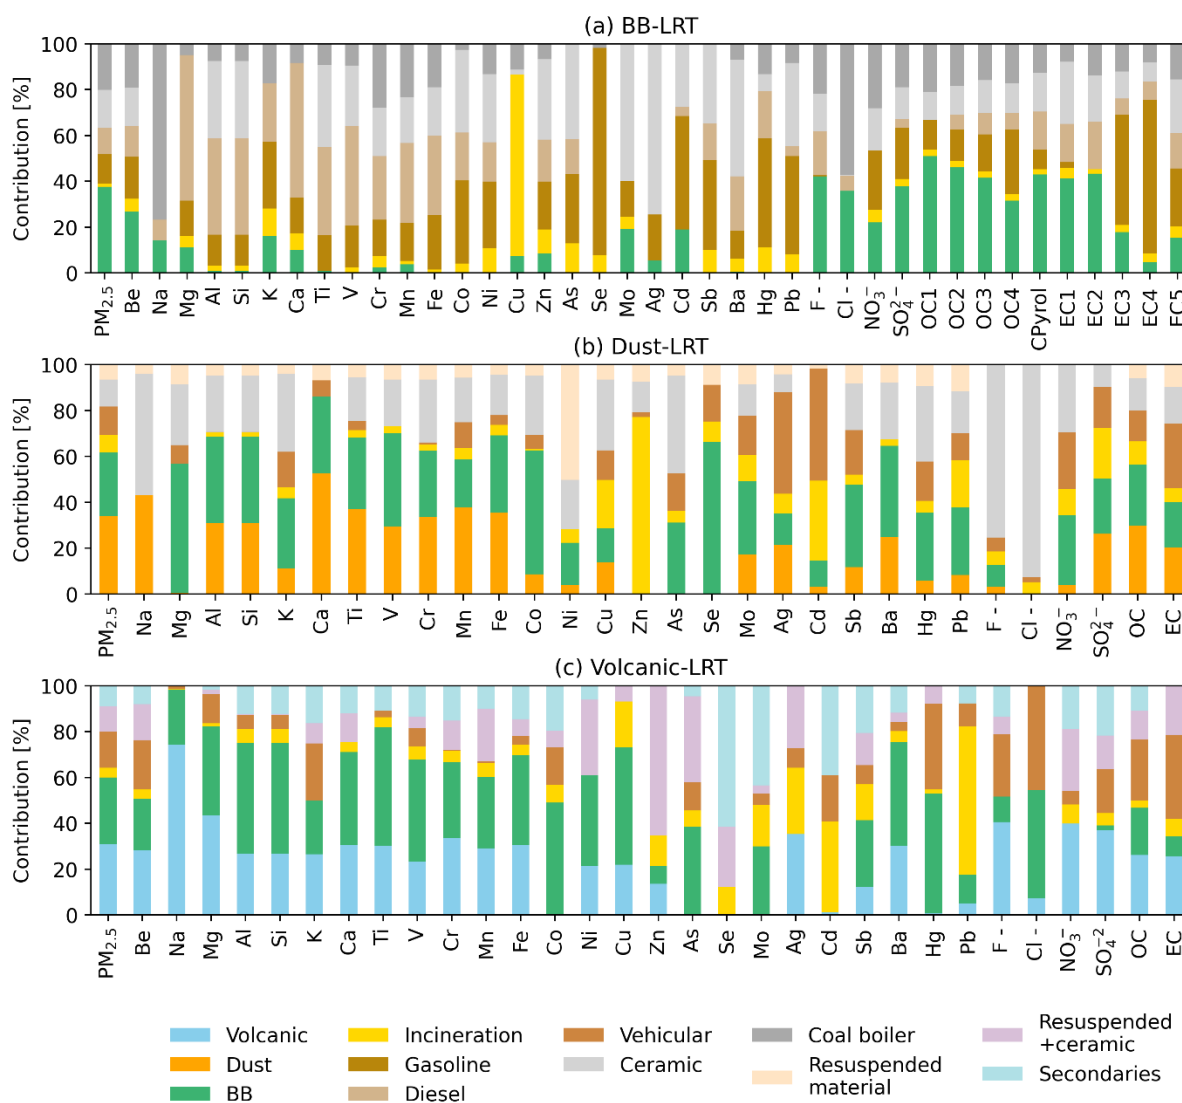

**Figure S3.** PMF's Factor profiles for the models run for the set of sampling days for (a) BB aerosols, (b) dust and (c) volcanic aerosols.

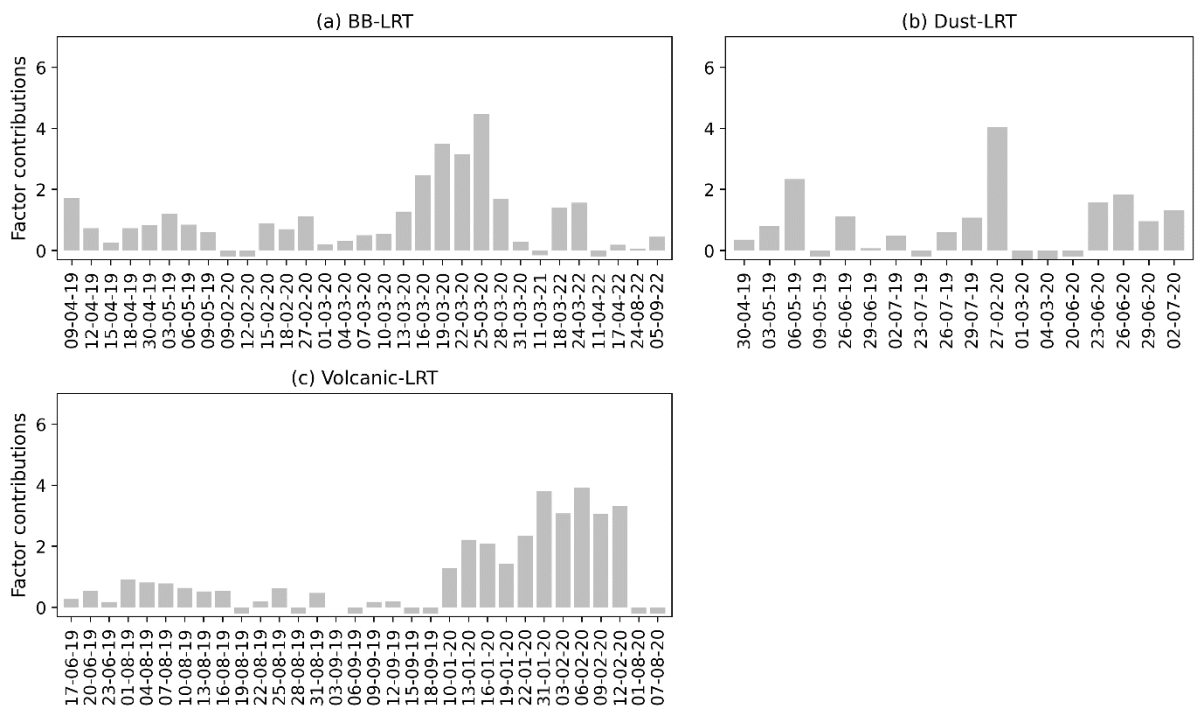

**Figure S4.** Factor contribution for BB, dust, and volcanic emissions factors identified in the PMF models for BB-LRT, Dust-LRT, and Volcanic-LRT
